# Supplementary material for: The Antibacterial Type VII Secretion System of Bacillus subtilis: Structure and Interactions of the Pseudokinase YukC/EssB
Source: PubMed Central journal article supplement (PMC9600267; doi:10.1128/mbio.00134-22), 2022-09-26
Supplement: mbio.00134-22-s0003.pdf [file mbio.00134-22-s0003.pdf]

**Table S1.**

| <b>Primers</b>         | <b>Sequence</b>                                                                     |
|------------------------|-------------------------------------------------------------------------------------|
| MluI _yukChis          | TTAACGCGTATGTCAGGTGAACAAAAATCATATTTAG                                               |
| yukChis_XbaI           | AATCTAGATTTGTCATCTTTTTTCTCATCTTTC                                                   |
| NdeI _yukChis          | GGGCATATGTCAGGTGAACAAAAATCATATTTAGAAAACC                                            |
| yukChis_NotI           | GATGGCGGCCGCTTTGTCATCTTTTTTCTCATCTTTCTTTTCTG                                        |
| NdeI_yukCstrep -       | GGGCATATGTCAGGTGAACAAAAATCATATTTAGAAAACC                                            |
| yukCstrep_KpnI         | CCCGGTACCTTTGTCATCTTTTTTCTCATCTTTCTTTTCTG                                           |
| pRSFduet_yukCA413strep | TTCTGCTTGTTTTCTTCGTCTGTTTGTGTCTG                                                    |
| pRSFduet_yukCA413strep | GAGTGGAGCCACCCGCAGTTC                                                               |
| NdeI _yukE.his         | GGCATATGGCAGGATTAATTCGTGTACACCCGAAG                                                 |
| yukE.his_BamHI         | GGGGATCCTTATCCGCGGATTTGATTTGCGATGTCTTGGTC                                           |
| pCDFduet_yukBA256.his  | GTGATGATGCCCTCTGTTGGTTTGATCGCTC                                                     |
| pCDFduet_yukBA256.his  | CATCACCCTAATCGAGTCTGGTAAATACCCATACGATGTCC                                           |
| Nde_yukB.HA            | GGGCATATGCTGCCATTCGGCCGTAAGG                                                        |
| yukB.HA_XhoI           | GGGCTCGAGAATCTAGCACTCTCCCTTTCAGCAGAAC                                               |
| NdeI_yueB.strep        | TATGATGACAGAACAACGAAAAAGCTTGATCAAG                                                  |
| yueB.strep_KpnI        | GTACCCGCTTCATACGTTTCATCGCTTTC                                                       |
| NdeI_yueB.strep        | TGATGACAGAACAACGAAAAAGC                                                             |
| YueB.strep_KpnI        | CCGCTTCATACGTTTCATCGCTTTC                                                           |
| YukC-Y207C             | GAAGCCAAAGCAAAAACATGCATACATATCCCGAGAAAG<br>CTTTCTCGGGATATGTATGCATGTTTTTGCTTTGGCTTC  |
| YukC-I208C             | CCAAAGCAAAAACATACATGCATATATCCCGAGAAAGAAG<br>CTTCTTTCTCGGGATATGGCAGTATGTTTTGCTTTGG   |
| YukC-H209C             | CAAAGCAAAAACATACATATGTATCCCGAGAAAGAAGTG<br>CACTTCTTTCTCGGGATACATATGTATGTTTTGCTTTG   |
| YukC-I210C             | GCAAAAACATACATACATTGCCCGAGAAAGAAGTGGAAAC<br>GTTCCACTTCTTTCTCGGGCAATGTATGTATGTTTTGCT |
| YukC-R212C             | CATACATACATATCCCGTGAAGAAGTGGAAACATCC<br>GGATGTTCCACTTCTTACCGGGATATGTATGTATG         |
| YukC-I221C             | GGAACATCCAGCGATATGCGGCCTGGGGCTCATTG<br>CAATGAGCCCCAGGCCAATATCGCTGGATGTTCC           |
| YukC-G222C             | CATCCAGCGATATATCTGCCTGGGGCTCATTGTTTTG<br>CAAAACAATGAGCCCCAGGCCAGATATATCGCTGGATG     |
| YukC-L223C             | CCAGCGATATATCGGCTGCGGGCTCATTGTTTTGCTTG<br>CAAGCAAAAACAATGAGCCCCAGGCCGATATATCGCTGG   |
| YukC-P231A             | CATTGTTTTGCTTGTAGCGGCACTTATTTATTCG<br>CGA ATA AAT AAG TGC CGC TAC AAG CAA AAC AAT G |

| <b>Primers (continues)</b> | <b>Sequence</b>                                    |
|----------------------------|----------------------------------------------------|
| <b>FG01 plasmid</b>        |                                                    |
| fragment Fw                | ATAGGGGGGCAGGATTAATTCGTGTCACACCCGAAG               |
| fragment Rv                | ATTCGCAGCATCTCTGTACTCGGTTTGACCGTTTCTG              |
| vector Fw                  | GAGATGCTGCGAAATTTGAACGCCAGCACA                     |
| vector Rv                  | ATCCTGCCCCCTATAGTGAGTCGTATTAATTCGCGG               |
| <b>FG02 plasmid</b>        |                                                    |
| pDR110 Fw                  | GAAATATTATGATACCGTTCGTATAGCATACATTATACGAAGTTATAAAT |
| pDR110 Rv                  | CAGATCCTTTACCGTTCGTATAATGTATGCTATACGAAGTTATCAGC    |
| FG01 Fw                    | CGAACGGTAAAGGATCTGGTTGAATGTCAGGTGAACA              |
| FG01 Rv                    | ATACGAACGGTATCATAATTTCAAGCCGGTCTCCGTTTGT           |

**Table S1. Primers used in this study**
