# Supplementary material for: The Antibacterial Type VII Secretion System of Bacillus subtilis: Structure and Interactions of the Pseudokinase YukC/EssB
Source: PubMed Central journal article supplement (PMC9600267; doi:10.1128/mbio.00134-22), 2022-09-26
Supplement: mbio.00134-22-s0004.pdf [file mbio.00134-22-s0004.pdf]

**Table S2.**

| <b>Plasmid</b>                  | <b>Host - Resistance</b>        | <b>Reference</b> |
|---------------------------------|---------------------------------|------------------|
| <b>BACTH assay</b>              |                                 |                  |
| pKT25/ <i>yukE</i>              | <i>E. coli</i> - Kan - 50 µg/mL | This study       |
| pKNT25/ <i>yukE</i>             | <i>E. coli</i> - Kan - 50 µg/mL | This study       |
| pKT25/ <i>yukD</i>              | <i>E. coli</i> - Kan - 50 µg/mL | This study       |
| pKNT25/ <i>yukD</i>             | <i>E. coli</i> - Kan - 50 µg/mL | This study       |
| pKT25/ <i>yukC</i>              | <i>E. coli</i> - Kan - 50 µg/mL | This study       |
| pKNT25/ <i>yukC</i>             | <i>E. coli</i> - Kan - 50 µg/mL | This study       |
| pKNT25/ <i>yukB</i>             | <i>E. coli</i> - Kan - 50 µg/mL | This study       |
| pKT25/ <i>yukB</i> Δ256         | <i>E. coli</i> - Kan - 50 µg/mL | This study       |
| pKT25/ <i>yueB</i>              | <i>E. coli</i> - Kan - 50 µg/mL | This study       |
| pKNT25/ <i>yueB</i>             | <i>E. coli</i> - Kan - 50 µg/mL | This study       |
| pKT25/ <i>yueB</i> Δ31-817      | <i>E. coli</i> - Kan - 50 µg/mL | This study       |
| pKNT25/ <i>yueB</i> Δ31-817     | <i>E. coli</i> - Kan - 50 µg/mL | This study       |
| <b>Protein expression</b>       |                                 |                  |
| pKT25/ <i>yueC</i>              | <i>E. coli</i> - Kan - 50 µg/mL | This study       |
| pKNT25/ <i>yueC</i>             | <i>E. coli</i> - Kan - 50 µg/mL | This study       |
| pKNT25/ <i>yxiD<sub>N</sub></i> | <i>E. coli</i> - Kan - 50 µg/mL | This study       |
| pUT18/ <i>yukE</i>              | <i>E. coli</i> -Amp 100 µg/mL   | This study       |
| pUT18C/ <i>yukE</i>             | <i>E. coli</i> -Amp 100 µg/mL   | This study       |
| pUT18/ <i>yukD</i>              | <i>E. coli</i> -Amp 100 µg/mL   | This study       |
| pUT18C/ <i>yukD</i>             | <i>E. coli</i> -Amp 100 µg/mL   | This study       |
| pUT18/ <i>yukC</i>              | <i>E. coli</i> -Amp 100 µg/mL   | This study       |
| pUT18C/ <i>yukC</i>             | <i>E. coli</i> -Amp 100 µg/mL   | This study       |
| pUT18C/ <i>yukB</i>             | <i>E. coli</i> -Amp 100 µg/mL   | This study       |
| pUT18/ <i>yukB</i>              | <i>E. coli</i> -Amp 100 µg/mL   | This study       |
| pUT18/ <i>yukB</i> Δ256         | <i>E. coli</i> -Amp 100 µg/mL   | This study       |
| pUT18/ <i>yueB</i>              | <i>E. coli</i> -Amp 100 µg/mL   | This study       |

**Table S2 (continues)**

|                                   |                                                                      |            |
|-----------------------------------|----------------------------------------------------------------------|------------|
| pUT18/ <i>yueC</i>                | <i>E. coli</i> -Amp 100 µg/mL                                        | This study |
| pUT18C/ <i>yueC</i>               | <i>E. coli</i> -Amp 100 µg/mL                                        | This study |
| pUT18/ <i>yxiD<sub>N</sub></i>    | <i>E. coli</i> -Amp 100 µg/mL                                        | This study |
| pUT18C/ <i>yxiD<sub>N</sub></i>   | <i>E. coli</i> -Amp 100 µg/mL                                        | This study |
| pBES_ <i>yukC</i> .his            | <i>E. coli</i> -Amp 100 µg/mL<br><i>B. subtilis</i> - Kan 30 µg/mL   | This study |
| pET15b_ <i>yukC</i> .his          | <i>E. coli</i> -Amp 100 µg/mL                                        | This study |
| pRSFduet_ <i>yukC</i> .strep      | <i>E. coli</i> - Kan - 50 µg/mL                                      | This study |
| pRSFduet_ <i>yukC</i> Δ413strep   | <i>E. coli</i> - Kan - 50 µg/mL                                      | This study |
| pET15b_ <i>yukE</i> .his          | <i>E. coli</i> -Amp 100 µg/mL                                        | This study |
| pCDF_ <i>yukB</i> Δ256.his        | <i>E. coli</i> - Spec - 50 µg/mL                                     | This study |
| pCDFduet_ <i>yukB</i> .HA         | <i>E. coli</i> - Spec - 50 µg/mL                                     | This study |
| pRSFduet_ <i>yueB</i> .strp       | <i>E. coli</i> - Kan - 50 µg/mL                                      | This study |
| <b>Competition assays</b>         |                                                                      |            |
| pDR244                            | <i>E. coli</i> -Amp 100 µg/mL<br><i>B. subtilis</i> - Spec 100 µg/mL | (63)       |
| pJM14_Δ <i>yxiD</i> - <i>yxxD</i> | <i>E. coli</i> -Amp 100 µg/mL<br><i>B. subtilis</i> - Spec 100 µg/mL | This study |
| <b>YukC complementation</b>       |                                                                      |            |
| FG01                              | <i>E. coli</i> -Amp 100 µg/mL                                        | This study |
| FG02                              | <i>E. coli</i> -Amp 100 µg/mL                                        | This study |

**Table S2. Plasmids used in this study**
