# Supplementary material for: The Antibacterial Type VII Secretion System of Bacillus subtilis: Structure and Interactions of the Pseudokinase YukC/EssB
Source: PubMed Central journal article supplement (PMC9600267; doi:10.1128/mbio.00134-22), 2022-09-26
Supplement: mbio.00134-22-s0005.pdf [file mbio.00134-22-s0005.pdf]

**Table S3.**

| <b>Strain</b>                                        | <b>Resistance</b> | <b>Reference</b>            |
|------------------------------------------------------|-------------------|-----------------------------|
| <i>B. subtilis</i> 168                               | none              | (65)                        |
| <i>B. subtilis</i> 168 <i>yukE::erm</i>              | Erytromycin       | BGSC                        |
| <i>B. subtilis</i> 168 <i>yukD::erm</i>              | Erytromycin       | BGSC                        |
| <i>B. subtilis</i> 168 <i>yukC::erm</i>              | Erytromycin       | BGSC                        |
| <i>B. subtilis</i> 168 <i>yukB::erm</i>              | Erytromycin       | BGSC                        |
| <i>B. subtilis</i> 168 <i>yueB::erm</i>              | Erytromycin       | BGSC                        |
| <i>B. subtilis</i> 168 <i>yueC::erm</i>              | Erytromycin       | BGSC                        |
| <i>B. subtilis</i> 168 $\Delta$ yxID-yxxD            | Spectinomycin     | This study                  |
| <i>B. subtilis</i> 168 $\Delta$ yukE                 | none              | This study                  |
| <i>B. subtilis</i> 168 $\Delta$ yukD                 | none              | This study                  |
| <i>B. subtilis</i> 168 $\Delta$ yukC                 | none              | This study                  |
| <i>B. subtilis</i> 168 $\Delta$ yukB                 | none              | This study                  |
| <i>B. subtilis</i> 168 $\Delta$ yueB                 | none              | This study                  |
| <i>B. subtilis</i> 168 $\Delta$ yueC                 | none              | This study                  |
| <i>E. coli</i> BL21 (DE3)                            | none              | (101)                       |
| <i>E. Coli</i> C43 (DE3)                             | none              | (102)                       |
| <i>E. coli</i> BTH101                                | none              | (101)                       |
| <i>E. coli</i> DH5 $\alpha$                          | none              | (Invitrogen <sup>1M</sup> ) |
| <i>B. subtilis</i> PseudoWT ( $\Delta$ yukC+yukC)    | none              | This study                  |
| <i>B. subtilis</i> P231A ( $\Delta$ yukC+yukC_P231A) | none              | This study                  |
| <i>B. subtilis</i> H209C ( $\Delta$ yukC+yukC_H209C) | none              | This study                  |
| <i>Bs</i> $\Delta$ yxxD-yxiD amyE::yxxD              | Kanamycin         | This study                  |
| Bs168 <i>yxiD::erm</i>                               | Erytromycin       | BGSC                        |

**Table S3. Strains used in this study**
